# Supplementary material
Source: publisher figshare collection journal article supplement (https://acs.figshare.com/ndownloader/files/10443423)
Supplement: Supplementary file 1 [file 10443423]

## Sheet: Essential
Gene ID	Gene	Product	Year	Lab	Reference	DOI	KO in epimastigotes			Essentiality Score
							Y/N	Method	Evidence for essentiality
TcCLB.503419.30	TC52	Thioredoxin-glutaredoxin like	1999	Ouassi	Allaoui et al., 1999	10.1046/j.1365-2958.1999.01440.x	N	Unable to generate gene knockout	Two rounds of transfection unable to generate null mutant	*
TcCLB.507091.40	DHOD	Dihydroorotate dehydrogenase	2005	Aoki	Annoura et al., 2005	10.1007/s00239-004-0078-8	N	Unable to generate gene knockout	Two rounds of transfection unable to generate null mutant	*
TcCLB.506811.190	GALE	UDP-glucose 4'-epimerase	2006	Ferguson	MacRae et al., 2006	10.1016/j.molbiopara.2006.02.011	N	Unable to generate gene knockout	Two rounds of transfection unable to generate null mutant	*
TcCLB.509153.90	DHFR-TS	Dihyrofolate reductase - thymidylate synthase	2006	Tarleton	Perez Brandon et al., 2006	10.1371/journal.pntd.0001418	N	Unable to generate gene knockout	Two rounds of transfection unable to generate null mutant	*
TcCLB.507547.40	ECH1	Enoyl-coenzyme A (CoA) hydratase 1	2011	Tarleton	Collins et al., 2011	10.1128/IAI.01080-10	N	Unable to generate gene knockout	Two rounds of transfection unable to generate null mutant	*
TcCLB.482471.19	SUB2	RNA helicase DEAD-box protein	2011	Avila	Serpeloni et al., 2011	10.1371/journal.pone.0020730	N	Unable to generate gene knockout	Two rounds of transfection unable to generate null mutant	*
TcCLB.507993.5	GPI8	Glycosylphosphatidylinositol 8	2013	Teixeira	Cardoso et al., 2013	10.1371/journal.pntd.0002369	N	Unable to generate gene knockout	Two rounds of transfection unable to generate null mutant	*
TcCLB.503527.40	GPI10	Glycosylphosphatidylinositol 10	2013	Teixeira	Cardoso et al., 2013	10.1371/journal.pntd.0002369	N	Unable to generate gene heterozygous	One round of transfection unable to generate heterozygous	*
TcCLB.511481.40	GPI12	Glycosylphosphatidylinositol 12	2013	Teixeira	Cardoso et al., 2013	10.1371/journal.pntd.0002369	N	Unable to generate gene heterozygous	One round of transfection unable to generate heterozygous	*
TcCLB.509011.40	CRT	Calreticulin	2013	Basombrío	Sánchez Valdéz et al., 2013	10.1016/j.molimm.2012.08.001	N	Unable to generate gene knockout	Two rounds of transfection unable to generate null mutant	*
TcCLB.510509.9	IP3R	Inositol 1,4,5-trisphosphate receptors	2013	Mikoshiba	Hamamoto et al., 2013	10.1111/mmi.12155	N	Unable to generate gene knockout	Two rounds of transfection unable to generate null mutant	*
TcCLB.511283.90	NMT	N-myristoyltransferase	2014	Fairlamb	Roberts et al., 2014	10.1042/BJ20131033	N	Two rounds of transfection	Two rounds of transfection unable to generate null mutant unless extra copy expressed from episome	**
TcCLB.510821.50	RPA2	Replication protein A	2016	Elias	Pavani et al., 2016	10.1371/journal.pntd.0005181	N	Two rounds of transfection	Two rounds of transfection unable to generate null mutant	*
TcCLB.511353.30	GALF	Triose-phosphate or UDP-galactofuranose transporter	2017	Tarleton	Soares Medeiros et al., 2017	10.1128/mBio.01788-17.	N	CRISPR-Cas9 disrusption (stop codon insertion)	Unable to generate mutants with both alleles disrupted	*
TcCLB.510101.50	CYP51	Lanosterol 14-alpha-demethylase	2017	Tarleton	Soares Medeiros et al., 2017	10.1128/mBio.01788-17.	N	CRISPR-Cas9 disrusption and Posaconasol selection	Posaconasol sensitivity indicates disruption of at least 1 copy of wild-type gene	*
TcCLB.509757.30	STI1	Stress-inducible protein 1	2017	Krieger	Schmidt et al., 2017	10.1016/j.parint.2017.10.009	N	Two rounds of transfection	Two rounds of transfection unable to generate null mutant	*

## Sheet: Non-essential
Gene ID	Gene	Product	Date	Lab	Reference	DOI	Phenotyping KO
							EPI	In vitro	In vivo	Other
TcCLB.509561.20	GP72	Glycoprotein 72	1993	Cross	Cooper et al., 1993	PMID: 8314840	x			Null mutant loses flagellum adhesion to cell body in epimastigotes
TcCLB.511557.10	OPB	Oligopeptidase B	1998	Andrews	Caler et al., 1998	10.1093/emboj/17.17.4975	x	x	x	Reduced virulence in vitro and in vivo
TcCLB.509775.20	LYT1	-	2001	Gonzalez	Manning-Cela et al., 2001	10.1128/IAI.69.6.3916-3923.2001	x	x		Reduced virulence in vitro; reduced hemolytic activity, enhanced differentiation
TcCLB.510329.130	GT	UDP-Glc:glycoprotein glucosyltransferase	2003	Parodi	Conte et al., 2003	10.1091/mbc.E03-04-0228	x	x		No apparent phenotype
TcCLB.506391.30	CUB	Calmodulin-ubiqutin	2007	Basombrío	Barrio et al., 2007	10.1016/j.exppara.2007.05.005	x		x	Reduced virulence in vivo
TcCLB.509351.6	MET-III	Metacyclic-specific protein III	2007	Kelly	Gluenz et al., 2007	10.1016/j.ijpara.2006.11.016	x	x		No apparent phenotype
TcCLB.506791.70	NTR	Nitro reductase	2008	Cheeseman	Wilkinson et al., 2008	10.1073/pnas.0711014105	x			Resistance to Nitroheterocyclic drugs
TcCLB.507547.40	ECH2	Enoyl-coenzyme A (CoA) hydratase 2	2011	Tarleton	Collins et al., 2011	10.1128/IAI.01080-10	x		x	Avirulent in vivo. Provide protective immunity to T. cruzi WT challenge
TcCLB. 509617.20	PFR1	Paraflagellar rod protein	2015	Docampo	Lander et al., 2015	10.1128/mBio.01012-15	x			Null mutant loses flagellum adhesion to cell body in epimastigotes
TcCLB.511215.119	PFR2	Paraflagellar rod protein	2015	Docampo	Lander et al., 2015	10.1128/mBio.01012-15	x			Null mutant loses flagellum adhesion to cell body in epimastigotes
TcCLB.506193.60	APx	ER-localised ascorbate-dependent peroxidase	2015	Kelly	Taylor et al., 2015	10.1371/journal.pntd.0003707	x	x	x	Reduced virulence in vitro but not in in vivo
TcCLB.506559.129	K2	eIF2α kinase	2015	Schenkman	Da Silva Augusto et al., 2015	10.1371/journal.ppat.1004618	x	x		Reduced virulence in vitro; involved in heme levels regulation
TcCLB.504213.110/TcCLB.509551.20	POT1	High affinity diamidine transporter	2016	Ullman	Hasne et al., 2016	10.1371/journal.pone.0152715	x	x		Reduced virulence in vitro
TcCLB.508257.260	AP1-γ	Adaptor Protein 1 gamma	2017	Fragoso	Moreira et al., 2017	10.1371/journal.pone.0179615	x	x		Reduced virulence in vitro
TcCLB.507257.60	FHc	Fumerate reductase - cytosolic	2017	Nonato	De Padua et al., 2017	10.1016/j.ijbiomac.2017.03.099	x	x		Reduced virulence in vitro
TcCLB.507669.10	FHm	Fumerate reductase - mitochondrial	2017	Nonato	De Padua et al., 2017	10.1016/j.ijbiomac.2017.03.099	x	x		Reduced virulence in vitro
TcCLB.503893.120	MCU	Mitochondrial calcium uniporter	2017	Docampo	Chuirillo et al., 2017	10.1128/mBio.00574-17	x	x		No loss of virulence; Deficient mitochondrial Ca2 uptake (epimastigotes)
TcCLB.416883.9	MCUb	Mitochondrial Ca2+ Uniporter b	2017	Docampo	Chuirillo et al., 2017	10.1128/mBio.00574-17	x	x		Reduced virulence; Deficient mitochondrial Ca2 uptake (epimastigotes)
TcCLB.510755.89	KMP-11	Kinetoplastid membrane protein 11	2017	Tarleton	Soares Medeiros et al., 2017	10.1128/mBio.01788-17.	x			Null mutant has cytokinesis deffect in epimastigotes
TcCLB.509631.140	FAZ1	Flagellar attachment zone protein 1	2017	Tarleton	Soares Medeiros et al., 2017	10.1128/mBio.01788-17.	x			Null mutant loses flagellum adhesion to cell body in epimastigotes
